# Supplementary material for: Assessing tobacco smoke exposure in pregnancy from self-report, urinary cotinine and NNAL: a validation study using the New Hampshire Birth Cohort Study
Source: HighWire-hosted journal article supplement (doi:10.1136/bmjopen-2021-054535), 2022-02-01

## SUPPLEMENTARY MATERIAL

### Assessing tobacco smoke exposure in pregnancy from self-report, urinary cotinine and NNAL: a validation study using the New Hampshire Birth Cohort Study

Methods - additional information: Definition of smoking categories used in this paper

Table S1: Characteristics of the Study population (women with 24 wk urine samples) and women not included (no 24wk urine)

Table S2: Characteristics of the women and their babies (full version)

Table S3: Relationship between reported smoking habit, urinary cotinine and urinary NNAL

Table S4: Correlation matrix for relationships between cotinine,  $\log_e$  Cotinine, NNAL,  $\log_e$  NNAL (Max N=1396)

Table S5: Maternal factors associated with self-reported smoking and misclassification of smoking. Unifactorial analyses

Table S6: Correlation matrix for relationships between maternal age, BMI, parity, education and SHS exposure

Table S7: Maternal factors associated with self-reported smoking and misclassification of smoking. Multivariable analyses

Table S8: Outcome of pregnancy by urinary cotinine and NNAL level in pregnancy using cut-points derived from self-reported smoking status

Figure S1: Scatterplot of Cotinine by NNAL ( $\log_e$  transformed)

Figure S2 A,B,C: Receiver operating characteristic curves A) To detect active smoking using cotinine, B) To detect SHS using cotinine, C) to detect active smoking using NNAL

**Methods: Additional information. Definition of smoking categories used in this paper**

Women in the study population were assigned to one of the following mutually exclusive categories based on the NHBCS Prenatal Questionnaire's and NHBCS Postpartum Questionnaire's smoking related questions: 1) current smoker 2) ex-smoker 3) non-smoker, secondhand smoke exposure 4) non-smoker, no secondhand smoke exposure 5) not reported.

Current smoker was defined as anyone who reported smoking at any point during the pregnancy or smoking more than zero cigarettes per day.

If a participant did not report active smoking during the pregnancy but reported smoking prior to getting pregnant, she was assigned to the ex-smoker category. A sub-category of ex-smoker, ex-smoker in 3 months pre-conception was defined as an ex-smoker who smoked within 3 months prior to conception.

If a participant was not defined as a current smoker or ex-smoker but reported secondhand smoke exposure at any point during the pregnancy or within 3 months prior to getting pregnant or residing with at least one person that regularly smoked inside their home during pregnancy, this participant was assigned to the non-smoker, prenatal SHS category. A sub-category 'ex-smoker, smoked in 3 months pre-conception' was defined as a participant who experienced SHS within 3 months prior to getting pregnant but not during the pregnancy.

If a participant did not report smoking history or secondhand smoking exposure 3 months prior or during the pregnancy and answered at least one question in either questionnaire as a non-smoker, such participant was defined as a non-smoker.

Those who did not answer any of the smoke related questions were assigned to 'not reported' category.

**Table S1: Characteristics of the Study population (women with 24 wk urine samples) and women not included (no 24wk urine)**

|                                   |                               | Study population<br>N=1396 | Not included<br>N=494 | p-value |
|-----------------------------------|-------------------------------|----------------------------|-----------------------|---------|
| Maternal age, years               | Mean (SD)                     | 31.25 (4.88)               | 31.06 (5.01)          | 0.440   |
|                                   | 18-24                         | 10% (140)                  | 12% (60)              | 0.406   |
|                                   | 25-34                         | 68% (946)                  | 66% (324)             |         |
|                                   | 35-45                         | 22% (310)                  | 22% (110)             |         |
| Maternal height, in               | Mean (SD)                     | 64.86 (2.65)               | 64.53 (2.54)          | 0.018   |
| Pre-pregnancy maternal weight, lb |                               | 153.85 (34.10)             | 161.22 (43.00)        | <0.001  |
| Pre-pregnancy maternal BMI        | Geometric mean (Geometric SD) | 25.03 (1.22)               | 26.31 (1.27)          | <0.001  |
|                                   | <18.5                         | 2.4% (34)                  | 1.8% (9)              | 0.013   |
|                                   | 18.5 to <25                   | 50% (694)                  | 42% (208)             |         |
|                                   | 25+                           | 40% (558)                  | 46% (225)             |         |
| Parity                            | 0                             | 42% (586)                  | 37% (182)             | <0.001  |
|                                   | 1                             | 36% (506)                  | 32% (157)             |         |
|                                   | 2+                            | 20% (275)                  | 21% (104)             |         |
| Mother's race                     | White                         | 97% (1357)                 | 91% (450)             | <0.001  |
| Maternal level of education       | High School or less           | 10% (140)                  | 11% (53)              | <0.001  |
|                                   | Junior college / college      | 50% (696)                  | 44% (218)             |         |
|                                   | Postgraduate                  | 27% (377)                  | 19% (96)              |         |
| Reported smoking                  | Non-smoker, no SHS            | 72% (999)                  | 59% (292)             | <0.001  |
|                                   | Non-smoker, SHS exposure      | 6.4% (90)                  | 7.5% (37)             |         |

|  |                |           |           |  |
|--|----------------|-----------|-----------|--|
|  | Ex-smoker      | 5.7% (79) | 5.7% (28) |  |
|  | Current smoker | 6.2% (86) | 6.1% (30) |  |
|  | Not reported   | 10% (142) | 22% (107) |  |

**Table S2: Characteristics of the women and their babies (full version)**

|                                           |             |              |
|-------------------------------------------|-------------|--------------|
| <b>Total</b>                              |             | 1,396        |
| <b>Maternal Characteristics</b>           |             |              |
| Maternal age, years                       | Mean (SD)   | 31.3 (4.9)   |
|                                           |             |              |
|                                           | 18-24       | 10% (140)    |
|                                           | 25-34       | 68% (946)    |
|                                           | 35-45       | 22% (310)    |
|                                           |             |              |
| Pre-pregnancy maternal weight (lb)        | Mean (SD)   | 153.9 (34.1) |
|                                           |             |              |
| Pre-pregnancy maternal height (in)        | Mean (SD)   | 64.9 (2.7)   |
|                                           |             |              |
| Pre-pregnancy maternal BMI                | Mean (SD)   | 25.6 (5.6)   |
|                                           | GM (GSD)    | 25.0 (1.2)   |
|                                           |             |              |
|                                           | <18.5       | 2.6% (34)    |
|                                           | 18.5 to <25 | 54% (694)    |
|                                           | 25+         | 43% (558)    |
|                                           |             |              |
| Parity                                    | 0           | 43% (586)    |
|                                           | 1           | 37% (506)    |
|                                           | 2+          | 20% (275)    |
|                                           |             |              |
| Mother's race                             |             |              |
| American Indian/Alaska Native             |             | 0.1% (2)     |
| Asian                                     |             | 0.6% (9)     |
| Native Hawaiian or Other Pacific Islander |             | 0.1% (2)     |

|                                                                                |                |
|--------------------------------------------------------------------------------|----------------|
| White                                                                          | 97% (1357)     |
| Mixed                                                                          | 1.6% (23)      |
| Unknown                                                                        | 0.1% (2)       |
|                                                                                |                |
| Maternal level of education                                                    |                |
| High School or less                                                            | 12% (140)      |
| Junior college / college                                                       | 57% (696)      |
| Postgraduate                                                                   | 31% (377)      |
|                                                                                |                |
| <b>Maternal Exposure</b>                                                       |                |
| Reported smoking at 24 weeks                                                   |                |
| Non-smoker, no SHS                                                             | 72% (999)      |
| SHS exposure pre-conception/prenatal                                           | 6.4% (90)      |
| Ex-smoker                                                                      | 5.7% (79)      |
| Current smoker                                                                 | 6.2% (86)      |
| Not reported                                                                   | 10% (142)      |
|                                                                                |                |
| Misclassified smoking habit <sup>2</sup>                                       | 1.9% (27/1396) |
|                                                                                |                |
| 1st trimester number of cigarettes smoked per day in current smokers (%), N=86 |                |
| 0                                                                              | 0% (0)         |
| 0.5 to < 5                                                                     | 37% (32)       |
| 5 to < 10                                                                      | 26% (22)       |
| 10+                                                                            | 35% (30)       |
| Unreported                                                                     | 2.3% (2)       |
|                                                                                |                |
| 2nd trimester number of cigarettes smoked per day in current smokers (%), N=86 |                |
| 0                                                                              | 26% (22)       |

|                                                                                |                       |                  |
|--------------------------------------------------------------------------------|-----------------------|------------------|
|                                                                                | 0.5 to < 5            | 19% (16)         |
|                                                                                | 5 to < 10             | 16% (14)         |
|                                                                                | 10+                   | 15% (13)         |
|                                                                                | Unreported            | 24% (21)         |
| 3rd trimester number of cigarettes smoked per day in current smokers (%), N=86 |                       |                  |
|                                                                                | 0                     | 26% (22)         |
|                                                                                | 0.5 to < 5            | 19% (16)         |
|                                                                                | 5 to < 10             | 16% (14)         |
|                                                                                | 10+                   | 15% (13)         |
|                                                                                | Unreported            | 24% (21)         |
| Urinary Cotinine, ng/ml                                                        |                       |                  |
|                                                                                | Mean (SD)             | 339.54 (1621.98) |
|                                                                                | GM (GSD) <sup>1</sup> | 0.99 (12.43)     |
|                                                                                | Undetectable          | 76% (1,063)      |
|                                                                                | 0.6 to <30            | 15% (208)        |
|                                                                                | 30+                   | 9.0% (125)       |
| NNAL, pmol/ml                                                                  |                       |                  |
|                                                                                | Mean (SD)             | 0.19 (0.81)      |
|                                                                                | GM (GSD)              | 0.05 (2.75)      |
|                                                                                | Undetectable          | 92% (1,274)      |
|                                                                                | 0.05 to <0.1          | 0% (0)           |
|                                                                                | 0.1+                  | 8.4% (117)       |
| Characteristics of smokers <sup>3</sup> : age                                  |                       |                  |
|                                                                                | Mean (SD)             |                  |
| Non-smoker (n=1088)                                                            |                       | 31.8 (4.5)       |

|                                                                          |           |                |
|--------------------------------------------------------------------------|-----------|----------------|
| Ex-smoker (n=79)                                                         |           | 30.5 (5.4)     |
| Current smoker (n=86)                                                    |           | 28.0 (5.7)     |
| Characteristics of smokers <sup>3</sup> : Pre-pregnancy BMI <sup>1</sup> | GM (GSD)  |                |
| Non-smoker (n=1076)                                                      |           | 25.1 (1.2)     |
| Ex-smoker (n=78)                                                         |           | 26.0 (1.2)     |
| Current smoker (n=86)                                                    |           | 24.8 (1.2)     |
| Characteristics of smokers <sup>3</sup> : Parity 1+                      | % (n)     |                |
| Non-smoker (n=1071)                                                      |           | 57% (612)      |
| Ex-smoker (n=70)                                                         |           | 49% (34)       |
| Current smoker (n=86)                                                    |           | 47% (40)       |
| Characteristics of smokers <sup>3</sup> : education beyond high school   | % (n)     |                |
| Non-smoker (n=1071)                                                      |           | 90% (963)      |
| Ex-smoker (n=70)                                                         |           | 83% (57)       |
| Current smoker (n=86)                                                    |           | 47% (35)       |
| <b>Infant Characteristics</b>                                            |           |                |
| Gestation age, weeks                                                     | Mean (SD) | 38.96 (1.82)   |
| Birthweight, grams                                                       | Mean (SD) | 3421.2 (552.3) |
| Birthweight z-score                                                      | Mean (SD) | -0.05 (1.03)   |
| Small-for-gestational age (below 10 <sup>th</sup> centile for age)       | % (n)     | 9.8% (132)     |
| Preterm birth (gestational age <37wks)                                   | % (n)     | 9.2% (129)     |
| Infant sex – male                                                        | % (n)     | 52% (716)      |



|                        |           |              |
|------------------------|-----------|--------------|
|                        |           |              |
| Head circumference, cm | Mean (SD) | 34.60 (1.74) |
|                        |           |              |
| Crown-heel length, cm  | Mean (SD) | 50.63 (3.17) |

**Footnotes**

- 1 Geometric mean and geometric standard deviation
- 2 Misclassified: Self-reported non-smoker with cotinine $\geq$ 30ng/ml
- 3 Full tables are in supplement (S3, S4)

**Table S3: Relationship between reported smoking habit, urinary cotinine and urinary NNAL**

|                                   |       | Non-smoker,<br>no SHS<br><br>N=999 | Non-smoker,<br>SHS pre-<br>conception<br><br>N=14 | Non-smoker,<br>prenatal SHS<br><br>N=76 | <sup>1</sup> Ex-smoker,<br>smoked in 3<br>months pre-<br>conception<br><br>N=56 | <sup>2</sup> Ex-smoker<br><br>N=79 | Current<br>smoker<br><br>N=86 | Not reported<br><br>N=142 |
|-----------------------------------|-------|------------------------------------|---------------------------------------------------|-----------------------------------------|---------------------------------------------------------------------------------|------------------------------------|-------------------------------|---------------------------|
| <b>COTININE LEVEL<br/>(ng/ml)</b> |       |                                    |                                                   |                                         |                                                                                 |                                    |                               |                           |
|                                   |       |                                    |                                                   |                                         |                                                                                 |                                    |                               |                           |
| Undetectable                      | % (n) | 87% (870)                          | 86% (12)                                          | 64% (49)                                | 57% (32)                                                                        | 57% (45)                           | 15% (13)                      | 52% (74)                  |
|                                   |       |                                    |                                                   |                                         |                                                                                 |                                    |                               |                           |
| 0.6-29.99                         | % (n) | 11% (112)                          | 14% (2)                                           | 34% (26)                                | 30% (17)                                                                        | 32% (25)                           | 14% (12)                      | 22% (31)                  |
|                                   |       |                                    |                                                   |                                         |                                                                                 |                                    |                               |                           |
| ≥ 30                              | % (n) | 1.7% (17)                          | 0% (0)                                            | 1.3% (1)                                | 13% (7)                                                                         | 11% (9)                            | 71% (61)                      | 26% (37)                  |
|                                   |       |                                    |                                                   |                                         |                                                                                 |                                    |                               |                           |
| <b>NNAL LEVEL<br/>(pmol/ml)</b>   |       |                                    |                                                   |                                         |                                                                                 |                                    |                               |                           |
|                                   |       |                                    |                                                   |                                         |                                                                                 |                                    |                               |                           |
| Undetectable                      | % (n) | 99% (984)                          | 100% (14)                                         | 96% (73)                                | 86% (48)                                                                        | 89% (70)                           | 34% (29)                      | 72% (104)                 |
|                                   |       |                                    |                                                   |                                         |                                                                                 |                                    |                               |                           |
| 0.05-0.09                         | % (n) | 0.2% (2)                           | 0% (0)                                            | 0% (0)                                  | 0% (0)                                                                          | 1.3% (1)                           | 1.2% (1)                      | 0.7% (1)                  |
|                                   |       |                                    |                                                   |                                         |                                                                                 |                                    |                               |                           |
| ≥0.1                              | % (n) | 1.3% (13)                          | 0% (0)                                            | 4.0% (3)                                | 14% (8)                                                                         | 10% (8)                            | 65% (56)                      | 26% (37)                  |
|                                   |       |                                    |                                                   |                                         |                                                                                 |                                    |                               |                           |

**Footnotes**

1,2: 'ex-smoker in 3 months preconception' (1) is a subset of all ex-smokers (2)

**Table S4: Correlation matrix for relationships between cotinine, log<sub>e</sub> Cotinine, NNAL, log<sub>e</sub> NNAL (Max N=1396)**

Data are correlation coefficient, P value, N

|                                 | Cotinine | NNAL                   | Log <sub>e</sub> Cotinine | Log <sub>e</sub> NNAL  | Cigs/day T1            | Cigs/day T2            | Cigs/day T3            |
|---------------------------------|----------|------------------------|---------------------------|------------------------|------------------------|------------------------|------------------------|
| <b>Cotinine</b>                 | 1        | 0.82<br><0.001<br>1396 | 0.72<br><0.001<br>1396    | 0.80<br><0.001<br>1396 | 0.54<br><0.001<br>1076 | 0.61<br><.001<br>1072  | 0.57<br><0.001<br>1073 |
| <b>NNAL</b>                     |          | 1                      | 0.67<br><0.001<br>1396    | 0.82<br><0.001<br>1396 | 0.45<br><0.001<br>1076 | 0.50<br><0.001<br>1072 | 0.39<br><0.001<br>1073 |
| <b>Log<sub>e</sub> Cotinine</b> |          |                        | 1                         | 0.91<br><0.001<br>1396 | 0.59<br><0.001<br>1076 | 0.63<br><0.001<br>1072 | 0.54<br><0.001<br>1073 |
| <b>Log<sub>e</sub> NNAL</b>     |          |                        |                           | 1                      | 0.58<br><0.001<br>1076 | 0.64<br><0.001<br>1070 | 0.55<br><0.001<br>1055 |
| <b>Cigarettes/day T1</b>        |          |                        |                           |                        | 1                      | 0.91<br><0.001<br>1072 | 0.83<br><0.001<br>1056 |
| <b>Cigarettes/day T2</b>        |          |                        |                           |                        |                        | 1                      | 0.88<br><0.001<br>1073 |
| <b>Cigarettes/day T3</b>        |          |                        |                           |                        |                        |                        | 1                      |

**Table S5: Maternal factors associated with self-reported smoking and misclassification of smoking<sup>1</sup>. Unifactorial analyses**

|                                | Non-smoker,<br>no SHS<br>N=982 | Non-smoker,<br>SHS exposure<br>N=89 | Ex-smoker<br>N=70 | Current<br>smoker<br>N=86 | Misclassified <sup>2</sup><br>N=27 | p-value |
|--------------------------------|--------------------------------|-------------------------------------|-------------------|---------------------------|------------------------------------|---------|
|                                | Mean (SD) or % (n)             |                                     |                   |                           |                                    |         |
| Age at enrolment (years)       | 32.1 (4.4)                     | 29.2 (4.5)                          | 30.8 (5.0)        | 28.0 (5.7)                | 30.1 (6.0)                         | <0.001  |
| Pre-pregnancy BMI <sup>3</sup> | 25.0 (1.2)                     | 27.8 (1.2)                          | 26.3 (1.2)        | 24.8 (1.2)                | 23.6 (1.2)                         | 0.037   |
| Parity: 1+                     | 60% (577)                      | 40% (35)                            | 49% (34)          | 47% (40)                  | 56% (15)                           | 0.001   |
| Education: beyond high school  | 93% (888)                      | 88% (75)                            | 83% (57)          | 47% (35)                  | 69% (18)                           | <0.001  |

**Footnotes**

1 Maximum number included in analyses is all women for whom smoking status was available (N=1254)

2 Misclassified: participants who reported being a non-smoker at 24 weeks and had urinary cotinine level 30ng/ml or more or equivalently NNAL level greater than 0.1pmol/ml

3 Geometric mean and geometric standard deviation

**Table S6: Correlation matrix for relationships between maternal age, BMI, parity, education and SHS exposure**

| Kendall's tau-b Correlation coefficient |           |                       |                         |                         |                          |
|-----------------------------------------|-----------|-----------------------|-------------------------|-------------------------|--------------------------|
| <i>p-value</i>                          |           |                       |                         |                         |                          |
| N                                       |           |                       |                         |                         |                          |
|                                         | Age       | BMI                   | Parity                  | Education               | SHS                      |
| Age                                     | 1<br>1253 | -0.03<br>0.11<br>1233 | 0.22<br><0.0001<br>1240 | 0.20<br><0.0001<br>1212 | -0.23<br><0.0001<br>1253 |
| BMI <sup>1</sup>                        |           | 1<br>1233             | 0.01<br>0.58<br>1221    | -0.04<br>0.12<br>1206   | 0.04<br>0.06<br>1233     |
| Parity <sup>2</sup>                     |           |                       | 1<br>1240               | -0.03<br>0.37<br>1200   | -0.14<br><0.0001<br>1240 |
| Education <sup>3</sup>                  |           |                       |                         | 1<br>1212               | -0.22<br><0.0001<br>1212 |
| SHS <sup>4</sup>                        |           |                       |                         |                         | 1<br>1254                |

**Footnotes**1 BMI log<sub>e</sub> transformed for analysis

2 Parity: 0 vs 1+

3 Education: high school vs beyond high school

4 SHS: Second-hand smoke exposure

**Table S7: Maternal factors associated with self-reported smoking and misclassification of smoking. Multivariable analyses<sup>1</sup>**

|                                                           | N   | Non-smoker, no SHS<br>N=982 | N  | Non-smoker, SHS exposure<br>N=88 | N  | Ex-smoker<br>N=70    | N  | Current smoker<br>N=86 | N  | Misclassified <sup>2</sup><br>N=27 | p-value |
|-----------------------------------------------------------|-----|-----------------------------|----|----------------------------------|----|----------------------|----|------------------------|----|------------------------------------|---------|
| OR (95% CI)                                               |     |                             |    |                                  |    |                      |    |                        |    |                                    |         |
| <b>Age at enrolment</b><br>(OR per 5 years)               | 982 | 1.00                        | 88 | 1.15<br>(0.78, 1.72)             | 70 | 1.09<br>(0.80, 1.47) | 86 | 1.00<br>(0.68, 1.44)   | 27 | 0.88<br>(0.55, 1.40)               | 0.86    |
| <b>Pre-pregnancy BMI<sup>3</sup></b><br>(OR per unit BMI) | 972 | 1.00                        | 86 | 0.75<br>(0.13, 4.28)             | 69 | 2.38<br>(0.68, 8.35) | 79 | 0.27<br>(0.05, 1.49)   | 27 | 0.10<br>(0.01, 1.06)               | 0.062   |
| <b>Parity:</b>                                            |     |                             |    |                                  |    |                      |    |                        |    |                                    |         |
| 0                                                         | 393 | 1.00                        | 53 |                                  | 36 |                      | 45 |                        | 12 |                                    | 0.51    |
| 1+                                                        | 577 |                             | 35 | 0.63<br>(0.31, 1.30)             | 34 | 0.69<br>(0.40, 1.19) | 40 | 1.00<br>(0.49, 2.05)   | 15 | 0.87<br>(0.38, 2.02)               |         |
| <b>Education:</b>                                         |     |                             |    |                                  |    |                      |    |                        |    |                                    |         |
| High school or less                                       | 69  | 1.00                        | 10 |                                  | 12 |                      | 40 |                        | 8  |                                    | <0.0001 |
| Beyond high school                                        | 888 |                             | 75 | 0.73<br>(0.28, 1.96)             | 57 | 0.39<br>(0.19, 0.83) | 35 | 0.09<br>(0.04, 0.20)   | 18 | 0.19<br>(0.07, 0.50)               |         |

**Footnotes**

1 Analyses include all women for whom the following were available: smoking status, age, BMI, parity, education (N=1253); reference category is non-smoker, no SHS apart from SHS exposed in pregnancy where the reference category is current smokers; all analyses adjusted for all other predictor variables. Table S1 includes the same material as table 4 but with the addition of subgroup total numbers.

2 Misclassified: participants who reported being a non-smoker at 24 weeks and had urinary cotinine level 30ng/ml or more

3 BMI log<sub>e</sub> transformed for analysis

**Table S8: Outcome of pregnancy by urinary cotinine and NNAL level in pregnancy using cut-points derived from self-reported smoking status<sup>1</sup>**

| Outcome                                    |                                       | Mean difference between categories (continuous outcome) or OR (binary outcome) | 95% CI          | Overall P value |
|--------------------------------------------|---------------------------------------|--------------------------------------------------------------------------------|-----------------|-----------------|
|                                            | <b>Cotinine (ng/ml)</b>               |                                                                                |                 |                 |
| Birthweight, gram                          | SHS vs non-smokers                    | 43.0                                                                           | (-137.9, 223.8) | 0.0263          |
|                                            | Active current smoking vs non-smokers | -127.7                                                                         | (-223.9, -31.6) |                 |
| Birthweight z-score                        | SHS vs non-smokers                    | 0.07                                                                           | (-0.27, 0.41)   | 0.0176          |
|                                            | Active current smoking vs non-smokers | -0.25                                                                          | (-0.43, -0.07)  |                 |
| Gestational age, weeks                     | SHS vs non-smokers                    | 0.02                                                                           | (-0.59, 0.62)   | 0.0483          |
|                                            | Active current smoking vs non-smokers | -0.40                                                                          | (-0.72, -0.08)  |                 |
| Small-for-gestational age (< 10th centile) | SHS vs non-smokers                    | OR=1.19                                                                        | (0.36, 4.07)    | 0.0056          |
|                                            | Active current smoking vs non-smokers | OR=2.56                                                                        | (1.48, 4.42)    |                 |
| Preterm birth (<37wks)                     | SHS vs non-smokers                    | OR=1.20                                                                        | (0.35, 4.04)    | 0.0187          |
|                                            | Active current smoking vs non-smokers | OR=2.30                                                                        | (1.32, 3.99)    |                 |
| Crown-heel length z-score                  | SHS vs non-smokers                    | -0.002                                                                         | (-0.52, 0.52)   | 0.1223          |
|                                            | Active current smoking vs non-smokers | -0.29                                                                          | (-0.56, -0.01)  |                 |
| Head circumference z-score                 | SHS vs non-smokers                    | 0.02                                                                           | (-0.35, 0.39)   | 0.2222          |
|                                            | Active current smoking vs non-smokers | -0.17                                                                          | (-0.37, 0.03)   |                 |
|                                            | <b>NNAL (pmol/ml)</b>                 |                                                                                |                 |                 |
| Birthweight, gram                          | Active smoking vs SHS and non-smokers | -112.2                                                                         | (-230.2, 5.8)   | 0.0618          |
| Birthweight z-score                        | Active smoking vs SHS and non-smokers | -0.21                                                                          | (-0.43, 0.02)   | 0.0677          |
| Gestational age, weeks                     | Active smoking vs SHS and non-smokers | -0.27                                                                          | (-0.66, 0.12)   | 0.1793          |
| Small-for-gestational age                  | Active smoking vs SHS and non-smokers | OR=1.89                                                                        | (0.96, 3.70)    | 0.0742          |

|                            |                                       |         |               |        |
|----------------------------|---------------------------------------|---------|---------------|--------|
| (< 10th centile)           |                                       |         |               |        |
| Preterm birth (<37wks)     | Active smoking vs SHS and non-smokers | OR=1.83 | (0.92, 3.63)  | 0.0998 |
| Crown-heel length z-score  | Active smoking vs SHS and non-smokers | -0.30   | (-0.64, 0.04) | 0.0807 |
| Head circumference z-score | Active smoking vs SHS and non-smokers | -0.13   | (-0.37, 0.11) | 0.2857 |

**Footnotes**

1 women reporting being active smokers but with low urinary cotinine levels, are classified as active smokers (see methods section)

2 All models include the following covariates: maternal age, log<sub>e</sub> BMI, maternal education (high school vs beyond high school), parity (0 vs 1+)



Figure S1: Scatterplot of Cotinine by NNAL ( $\log_e$  transformed)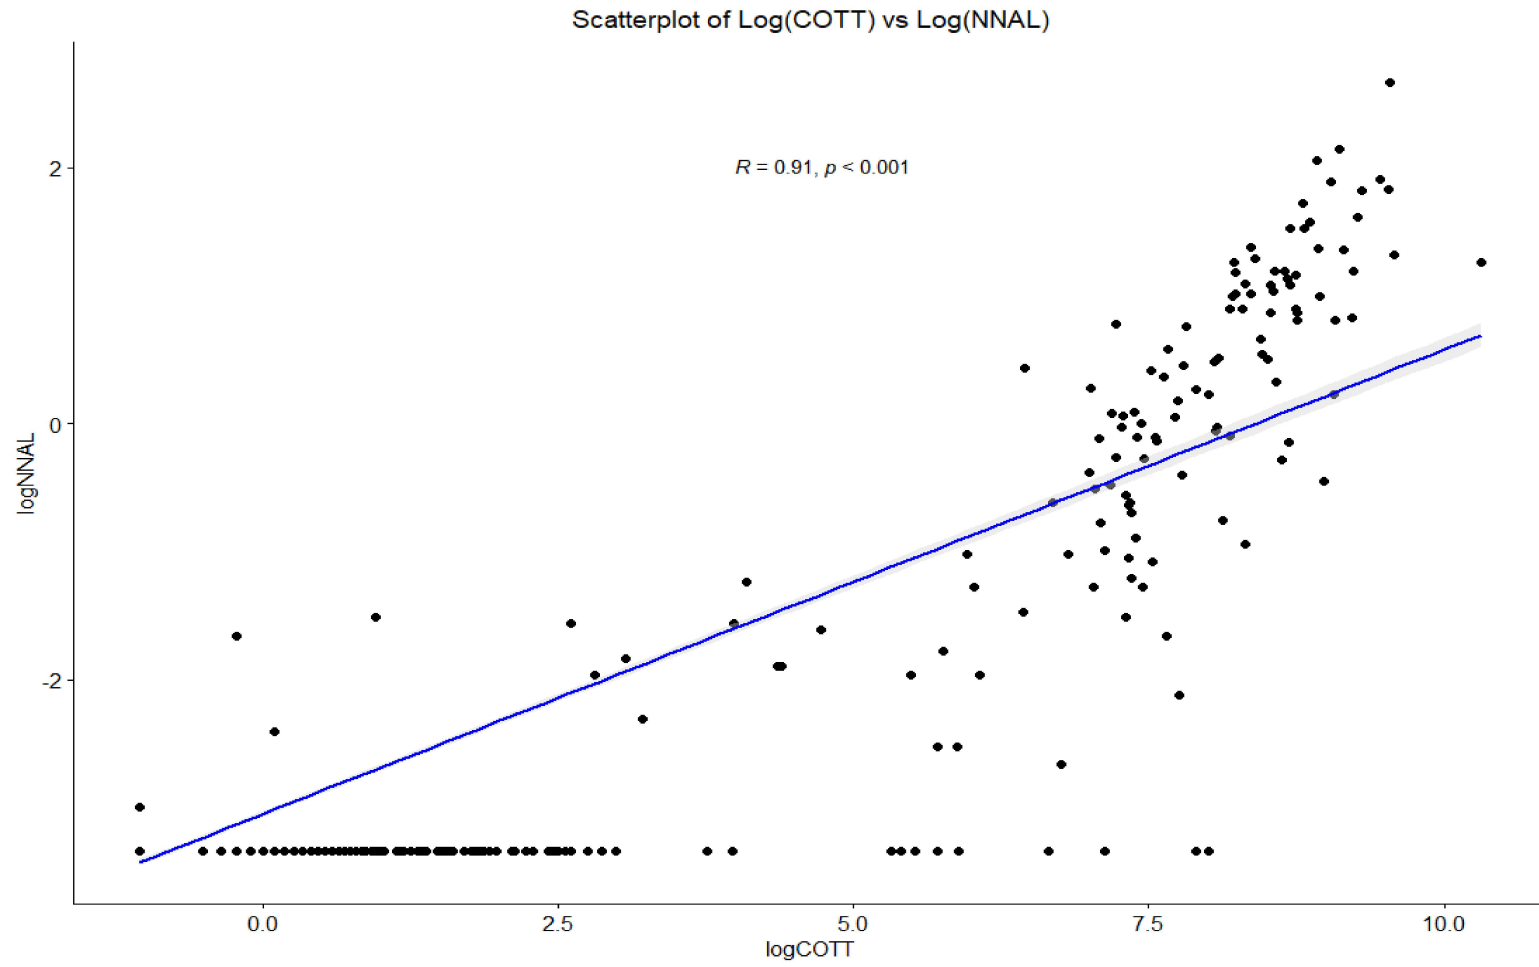

Figure S2 A,B,C: Receiver operating characteristic curves A) To detect active smoking using cotinine, B) To detect SHS using cotinine, C) to detect active smoking using NNAL

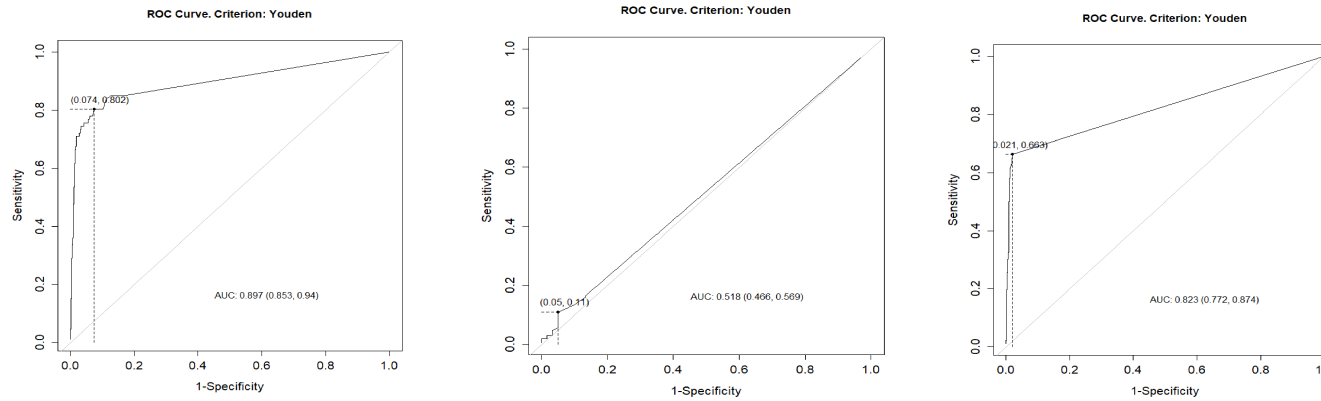

Supplement: bmjopen-2021-054535supp001_data_supplement.pdf [file bmjopen-2021-054535supp001_data_supplement.pdf]
